# Supplementary material for: Functional verification of computationally predicted qnr genes
Source: PubMed Central journal article supplement (PMC4222258; doi:10.1186/1476-0711-12-34), 2013-11-21
Supplement: 1476-0711-12-34-S1.pdf [file 1476-0711-12-34-S1.pdf]

TABLE S1. Nucleotide sequences of the *novel candidate (nc)* genes

|            |                                                                |
|------------|----------------------------------------------------------------|
| <b>nc1</b> | originates from metagenome (MG-RAST: 4441580)                  |
| 1          | ATGGGTGAGGTAATGGACATACAAAATAGGCGAAGGCTATACCAACTTAGATCTGCGCAAT  |
| 61         | AAGGACTTCAGCGGCCAAGATTTAACCGACTGCACCTTTAGCCAATGCCAATTTGCGGGC   |
| 121        | AGTGTCTTCCGCGGCGCCAACCTGACTAACTGTCAGTTTGTATCGATGCCAATTCACAAC   |
| 181        | AGTGATCCAGACGAGCCCGCAAGCTTTGAATGGGCAAACCTTGCGCGAAGCGGTGTTTAGC  |
| 241        | CATTGCGACCTAAACATGGTGGCCTTCAATCATTGCCTGGGTACGACCTGAGCTTTAAA    |
| 301        | GAATGTCAAATGCAGGGCGCAGATTTATCTCTAGGAGATTTCAAATGCCTGTAGGCAAT    |
| 361        | CTGGATTTGGCCGCACTGACCATTACCGACTGTAATTTTTCTACGGCAATTTATCCAAT    |
| 421        | ACCTTTTTGGTTGGCTGCAAGCTTTCCAACAATCGACTAACTGAATGCTTGTAGATTTT    |
| 481        | GCAGATCTAAGTGATGCGGATTTAAGCGACAGCGAAATGTTAATGTTTCAGCACGCAAC    |
| 541        | TGCAAACCTCAAAGGCGCAGACTTGCGCGGTGCAAGCTTCAACAACCTTAGATTTGAAAAGC |
| 601        | TTAGACCTAGAGGGTGTGCGCCTGTACTACAACCAGTTACCTGCGTTAGTAGATTGA      |
| <b>nc2</b> | originates from <i>Vibrio furnissii</i> genome (CP002378.1)    |
| 1          | ATGAAATTAACCATCACACTTACCAACACACCGATTTCTCAAATCGGGATTGTGCGAAC    |
| 61         | TTAGTTTTCAACGATTGTTGCTTCTATCAATGCAACTTTAGCCGTGCCGACATGCGTGAT   |
| 121        | TCCAAATTCATCAATTGCAGCTTTATTGAGAAAAGCGATGTGGAGGGATGTAATTTTGCG   |
| 181        | TATGCCGATCTCAGAGATGCGTCTTTCAACACTGCCGATTGGCGATGGCTCATTTCAGT    |
| 241        | GGGGCGGACTGTTTTGGAATTGAACTGAGAGATTGTGATTTAAAAGGTGCCAATTTTTCT   |
| 301        | CGCGCCCGCTTTGTTAATCAGGTCTCGAACAAAATGTTTTTTTTGTTCCGCGTACATCACG  |
| 361        | GGATGTAATTTATCCTATGCCAACTTGGAGCGGCAGTGCCTCGAAAAATGTGATCTGTTT   |
| 421        | GAAAATCGCTGGATTGGCGCAACTTGCACGGGGTTTCTTTTAAAGAGTCTGATTTAAGC    |
| 481        | CGGGGTTCATTTTAGAGGACTGCTGGGAACAAGCGCGCTTCCAAGGTTGTGACTTAACC    |
| 541        | CATATTGAACTGACCGGGTTGGATCCCCGCAGAGTGGATTTAACGGGGGTAAAAATTTGC   |
| 601        | GATTGGCAGCAAGAACAACCTGCTAGAGAAGCTGGGTGTGATTGTGGTTCCGGACTAA     |
| <b>nc3</b> | originates from metagenome (SRA: SRX032366)                    |
| 1          | ATGAGTCTGATGTTGAAGGGTGAAAAGATTGACCGTAACCGCTTTACCGGCGAGAAGATT   |
| 61         | GAAAACGGCAGCTTTATGCTGTGTGATTTTTCGGGCGCCGATCTGACCGGCACCGAGTTT   |
| 121        | ATCGGCTGCCAGTTTTACGATCGTGACAGCCGACAGGGCGGCAATTTACGCCGTGCGATA   |
| 181        | CTCAAAGACGCCAGCTTCAGAAGCTGCGATTTGTGATGGCCGACTTCCGCTACGCCAGC    |
| 241        | GCCCTGGGGCTGGAGATCCGCGAATGCCGCGCGCAGGGCGCCGATTTTCGCGGCGCCAGT   |
| 301        | TTTATGAACATGATCACCAGCCGCATCGGGTTTTGCAGCGCCTATATCACAAAAGCAAC    |
| 361        | CTGAGCTACGCCAACTTCGCCAAGGTGGTGTGCTGGAGAAATGCGAGCTGTGGGAAAACCGC |
| 421        | TGGCAAGGCACACAGGGACTCGGCGCCAGCTTCAGCGGCTCCGATCTGTCCGGCGGCGAG   |
| 481        | TTCTCCGATTTCGACTGGCGCGCCGCGACGTACCCAGTGCGATTTGAGCAATGCGGAA     |
| 541        | CTGGGCGAATTGGATTTACGCACCACCGATCTGCAGGGCGTCAAATGGACAGCCACCAG    |
| 601        | GCCGCGCAGCTGCTGGAGCGGCTGGGGATCGCGATCGTCGGCTGA                  |
| <b>nc4</b> | originates from metagenome (SRA: SRX032366)                    |
| 1          | ATGAGTCTGATGTTGAAGGGTGAAAAGATTGACCGTAACCGCTTTACCGGCGAGAAGATT   |
| 61         | GAAAACGGCAGCTTTATGCTGTGTGATTTTTCGGGCGCCGATCTGACCGGCACCGAGTTT   |
| 121        | ATCGGCTGCCAGTTTTACGATCGTGACAGCCGACAGGGCGGCAATTTACGCCGTGCGATA   |
| 181        | CTCAAAGACGCCAGCTTCAGAAGCTGCGATTTGTGATGGCCGACTTCCGCTACGCCAGC    |
| 241        | GCCCTGGGGCTGGAGATCCGCGAATGCCGCGCGCAGGGCGCCGATTTTCGCGGCGCCAGT   |
| 301        | TTTATGAACATGATCACCAGCCGCATCGGGTTTTGCAGCGCCTATATCACAAAAGCAAC    |
| 361        | CTGAGCTACGCCAACTTCGCCAAGGTGGTGTGCTGGAGAAATGCGAGCTGTGGGAAAACCGC |
| 421        | TGGCACGGCGCACAGGTGCTCGGCGCCAGCTTCAGCGGCTCCGATCTGTCCGGCGGCGAG   |
| 481        | TTCTCCGATTTCGACTGGCGCGCCGCGACGTACCCAGTGCGATTTGAGCAATGCGGAA     |
| 541        | CTGGGCGAATTGGATTTACGCACCACCGATCTGCAGGGCGTCAAATGGACAGCCACCAG    |
| 601        | GCCGCGCAGCTGCTGGAGCGGCTGGGGATCGCGATCGTCGGCTGA                  |
