# Supplementary material for: Functional verification of computationally predicted qnr genes
Source: PubMed Central journal article supplement (PMC4222258; doi:10.1186/1476-0711-12-34), 2013-11-21
Supplement: 1476-0711-12-34-S2.pdf [file 1476-0711-12-34-S2.pdf]

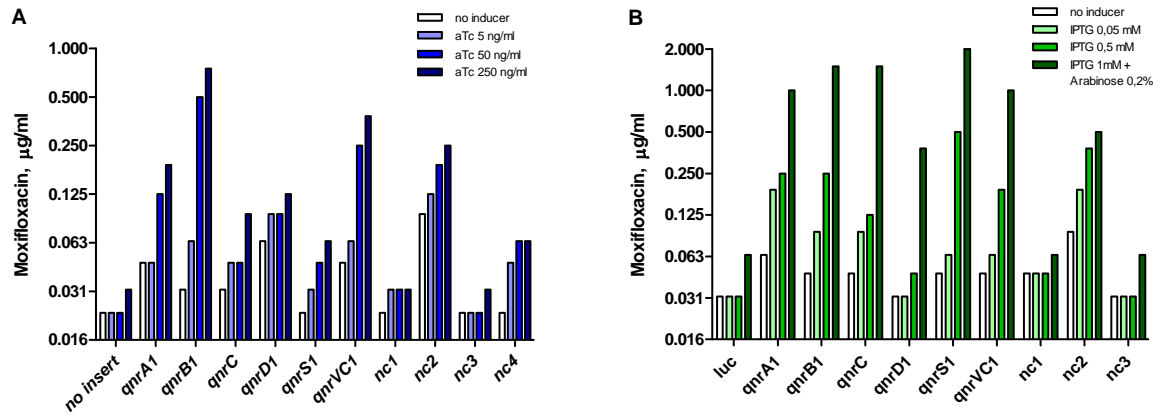

Figure S1. Moxifloxacin MICs for recombinant *E. coli* strains carrying known *qnr* genes or novel candidates (*nc1-4*). The investigated genes are situated on pZE21 (A) or pZA14 (B), and expression was stimulated by adding indicated concentrations of the inducers aTc (A) or IPTG/Arabinose (B).
